# Supplementary material
Source: Royal Society of Chemistry journal article supplement (doi:10.1039/d6ay00474a)
Supplement: d6ay00474a1.pdf [file d6ay00474a1.pdf]

**Supplementary Material**  
**A Novel High-Sensitivity Fluorescent Detection**  
**Technology for Zearalenone Based on PER-Triggered**  
**crRNA Conformational Change and CHA-Coordinated**  
**Energy Supply**

Runlong Ma<sup>a#</sup>, Jiying Xiao<sup>a#</sup>, Wentong Yu<sup>a</sup>, Chunyuan Huo<sup>a</sup>, Shuangyu Meng<sup>c</sup>, Ziyang Zhao<sup>a</sup>, Zhiqiang Guo<sup>b</sup>, Xinru Ren<sup>b</sup>, Haiping Zhang<sup>b</sup>, Bowen Li<sup>b</sup>, Yu Wang<sup>a,d</sup>, Su Liu<sup>c,d</sup> and Jiadong Huang<sup>a,d,e\*</sup>

<sup>a</sup> School of Biological Sciences and Technology, University of Jinan, Jinan 250022, P.R. China.

<sup>b</sup> School of Chemistry and Chemical Engineering, University of Jinan, Jinan 250022, P.R. China.

<sup>c</sup> School of Water Conservancy and Environment, University of Jinan, Jinan 250022, P.R. China

<sup>d</sup> Jinan Engineering Research Center of Plant-Microbial Interaction, Jinan 250022, P.R. China.

<sup>e</sup> Key Laboratory of Chemical Sensing & Analysis in Universities of Shandong School of Chemistry and Chemical Engineering, University of Jinan, Jinan 250022, PR China

# These authors contributed equally to this work and are considered co-first authors.

---

\*Corresponding Author.

E-mail: chm\_huangjd@ujn.edu.cn(J. Huang).

## **1. Experimental section**

### **1.1 Reagents and materials**

Oligonucleotide, N,N,N',N-tetramethyl ethylenediamine (TEMED), ammonium persulfate (AP), 30% acrylamide solution (29:1), DEPC-treated water were purchased from Shanghai Sangong Biotechnology Co., Ltd. (Shanghai, China).  $10 \times$  TBE Buffer, DNA Marker and GelRed were purchased from thermo fisher Co., Ltd (Beijing, China). Microcystin (MC-LR) were purchased from Macklin Inc. (Shanghai, China). Cas12a protein (Lba Cas12a) were purchased from New England Biolabs. Saxitoxin were purchased from Sichuan Hengcheng Zhiyuan Biotechnology Co., Ltd. Zearalenone(ZEN), Ochratoxin A(OTA), Dimethyl Sulfoxide(DMSO)were purchased from Shanghai Aladdin Biochemical Technology Co.,Ltd.Ochratoxin B(OTB),Aflatoxin B<sub>1</sub>(ATB<sub>1</sub>) were purchased from Sigma-Aldrich(Shanghai)Trading Co.,Ltd.

### **1.2 Apparatus.**

All fluorescence profiles were determined by an Agilent Cary Eclipse spectrophotometer (Agilent, USA). Polypropylene gel electrophoresis (PAGE) was first performed using a DYCZ-24DN electrophoresis apparatus (LIUYI, Beijing, China), followed by shaking with  $1 \times$  GelRed, WD-9405F decolorization shaker (LIUYI, Beijing, China). and finally, a Bio-Rad gel imaging system (Bio-Rad, USA) was used to analyze the samples.

## 2. Supporting table.

The DNA fragments shown in Table S1 were all purified by HPLC. The reagents used in the experiment were all of analytical purity.

**Table S1.** Nucleotide sequences used in this study

| Oligonucleotides name | Sequence (5' to 3')                                                                                                                                       | description |
|-----------------------|-----------------------------------------------------------------------------------------------------------------------------------------------------------|-------------|
| Apt                   | TTAATCATCTATCTATGGTACATTACTATCTGTAATGTGATATG                                                                                                              |             |
| T                     | TGTACCATAGATAGATGAGTTAATG                                                                                                                                 |             |
| YL                    | AATTTCTACTAAGTGTTTCATTCAT/i2OMeG/GCCGTTTTTTTTTCG<br>GC/i2OMeC/ATGAATGAACACTTAGTAGAAATTATTTTTGGTTT<br>CCCATTAACTCATCTATCTATGGTACAGTTAATGGGAAACCAA<br>AAAAT |             |
| Primer                | CAAAAAAT                                                                                                                                                  |             |
| HP1                   | AUGAAUGA ACACUUAGUAGAAAUU AUUUUUUGGUUUC<br>UCAAAGGG GACCAAAAAAU AAUUUCUACUAAGUGU<br>AGAUGCUCUGUCCUAACAGGCUA                                               |             |
| HP2                   | AGGTC CCCTTTGA GAAACCAAAAAAT<br>AATTTCTACTAAGTGT TTTATCAAAGGG                                                                                             |             |
| NTS                   | GGGGTCTTTAGCTTCTGTCCTAACAGGCTAAGT                                                                                                                         |             |
| TS                    | ACTTAGCCTGTTAGGACAGAAGCTAAAGACCCC                                                                                                                         |             |
| F-Q                   | FAM-TTATT-BHQ                                                                                                                                             |             |
